# Supplementary material
Source: PubMed Central journal article supplement (PMC1913799)

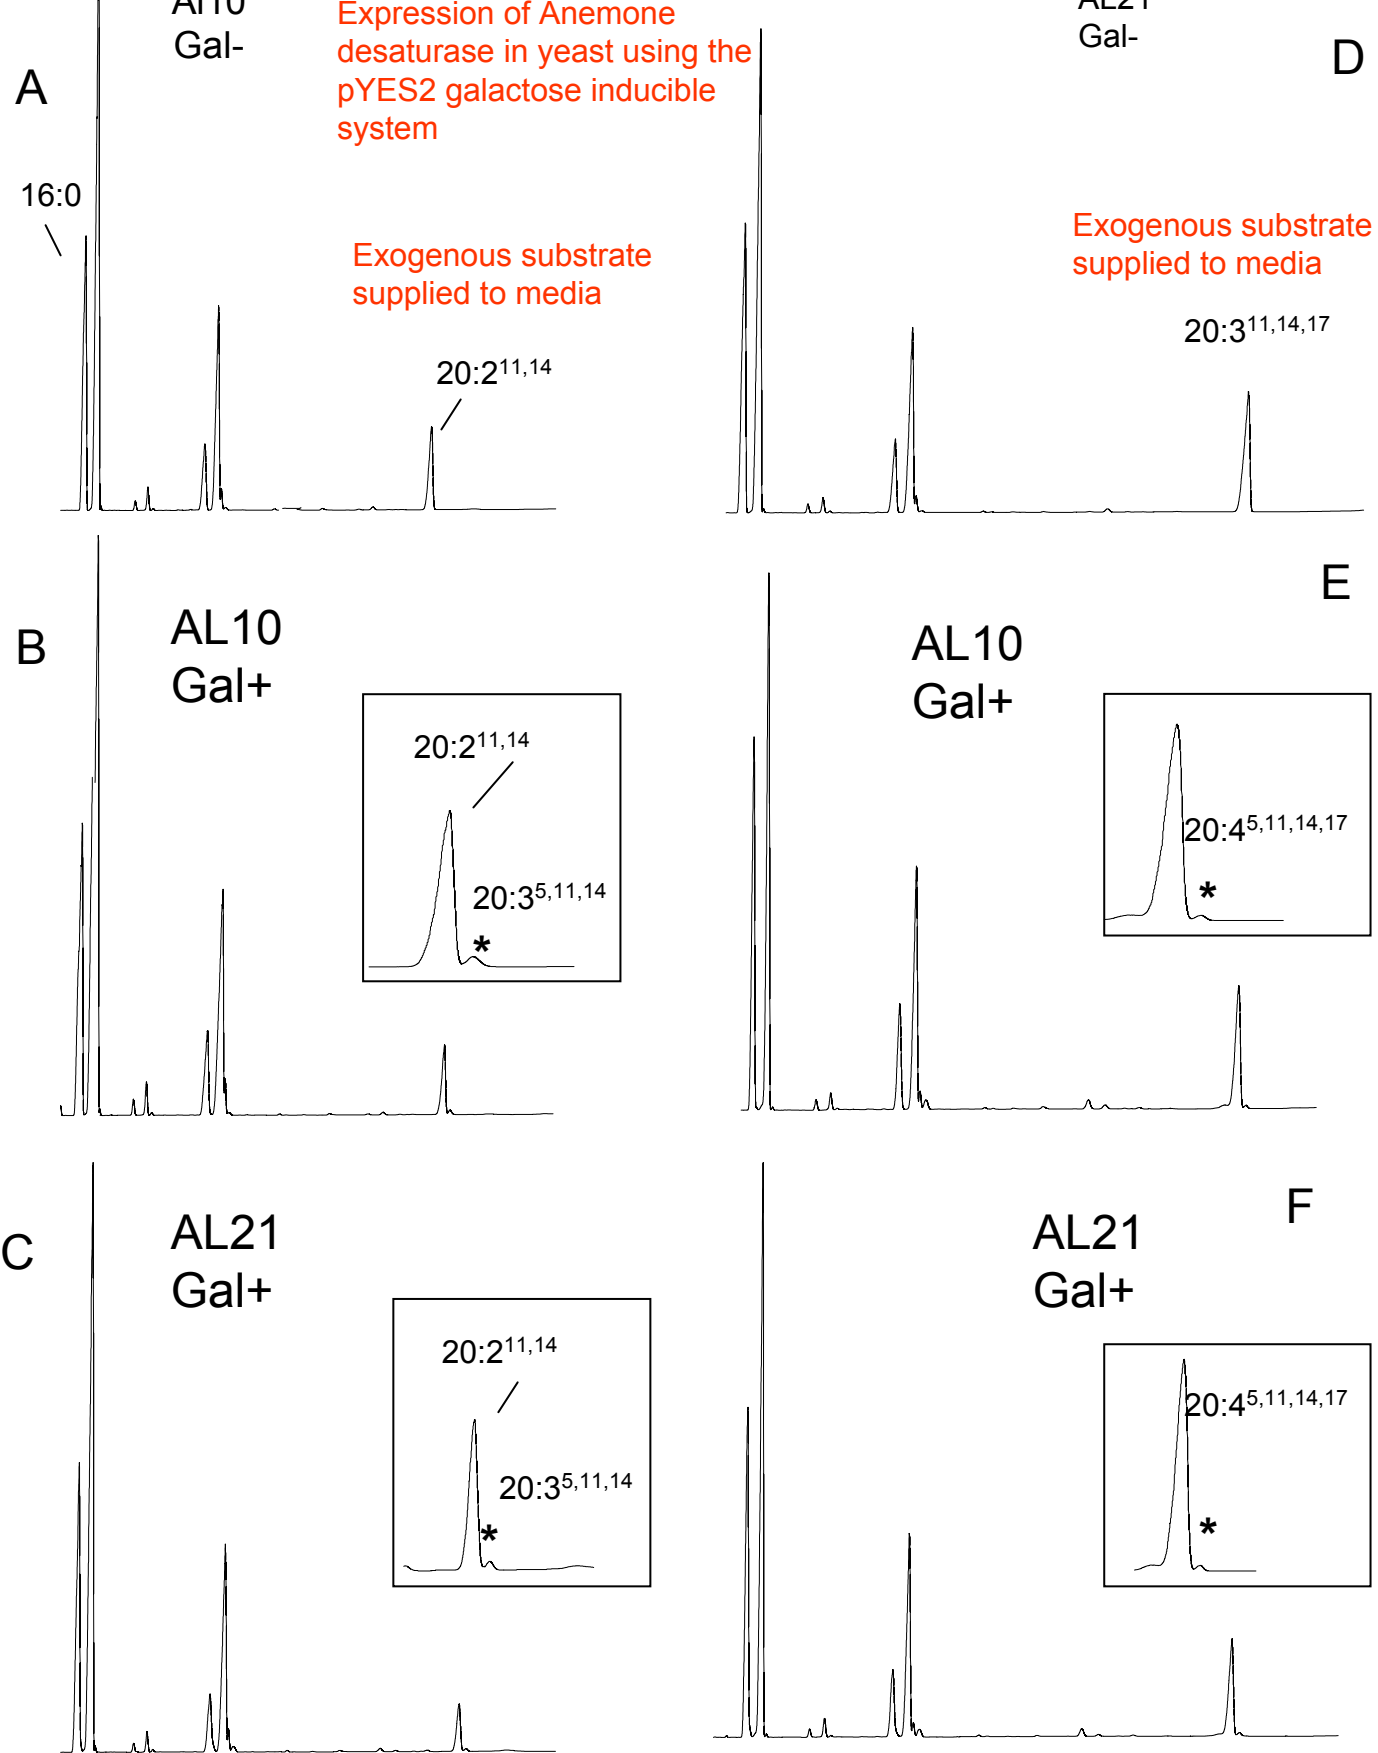

Data shows the very low activity of Anemone desaturases in yeast

Supplement: plntphys_pp.107.098202_1.pdf [file plntphys_pp.107.098202_1.pdf]
